# Supplementary figures and images for: Molecular Mechanisms of the Cytotoxic Effect of Recombinant Selenoprotein SELENOM on Human Glioblastoma Cells
Source: MDPI journal article supplement (doi:10.3390/ijms24076469), 2023-03-30

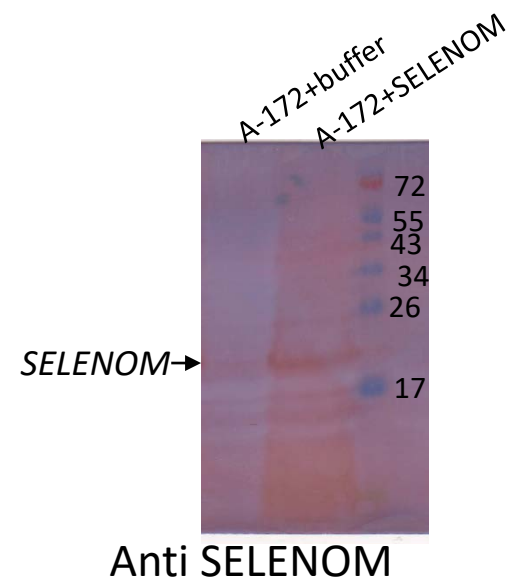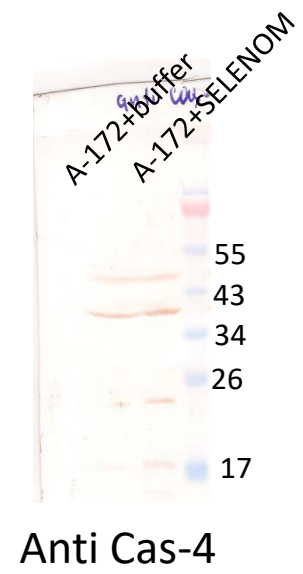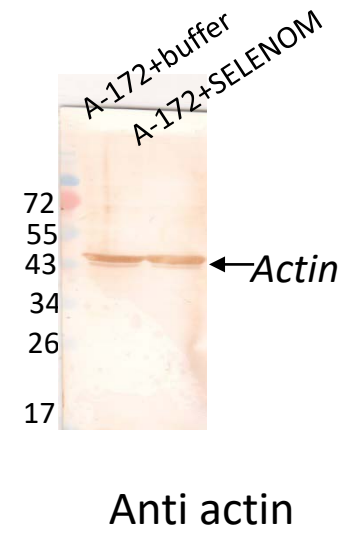

Supplement: s1 [file s1]
